# Supplementary material
Source: PubMed Central journal article supplement (PMC7653536)
Supplement: jamapediatr-e203557-s002.pdf [file jamapediatr-e203557-s002.pdf]

## Data Sharing Statement

Rosenstock. Effect of a Home-Visiting Intervention to Reduce Early Childhood Obesity Among Native American Individuals. *JAMA Pediatr.* Published November 09, 2020. 10.1001/jamapediatrics.2020.3557

### Data

**Data available:** No

### Additional Information

**Explanation for why data not available:** The data sets generated during and/or analyzed during the current study are not publicly available as they are owned by the participating Native American community. Requests to obtain the data sets must be made to the participating community's governing bodies.
